# Supplementary material for: GOtcha: a new method for prediction of protein function assessed by the annotation of seven genomes
Source: PubMed Central journal article supplement (PMC535938; doi:10.1186/1471-2105-5-178), 2004-11-18
Supplement: 1471-2105-5-178-S1.pdf [file 1471-2105-5-178-S1.pdf]

## Supplementary information

Each column lists the most granular correct terms with P-score > 50%. More than one term indicates hits to more than one branch. Each term is listed as GO ID, I-score ± s.d., P-score, (description)

### Manual assessment of false positives – IEA annotation included

| Gene name and annotated product description | Original human GO annotation                                         | With IEA annotations                                                                                      |                                                                                                                      |
|---------------------------------------------|----------------------------------------------------------------------|-----------------------------------------------------------------------------------------------------------|----------------------------------------------------------------------------------------------------------------------|
|                                             |                                                                      | Lowest scoring true positive                                                                              | Highest scoring false positive with P-score > 50%                                                                    |
| PFL2465<br>Thymidylate kinase               | GO:0006235 (dTTP biosynthesis)                                       | GO:0006235, 0.59±0.48, 98% (dTTP biosynthesis)<br>GO:0006233, 0.59±0.48, 100% (dTDP biosynthesis)         | n/a                                                                                                                  |
|                                             | GO:0008372 (cellular_component unknown)                              | n/a                                                                                                       | n/a                                                                                                                  |
|                                             | GO:0004798 (thymidylate kinase activity)<br>GO:0005524 (ATP binding) | GO:0004798, 0.9893±0.0142, 100% (thymidylate kinase activity)<br>GO:0005524, 0.40±0.49, 68% (ATP binding) | n/a                                                                                                                  |
| PFL1875w<br>hypothetical protein            | GO:0000004 (biological process unknown)                              | GO:0008152, 0.53±0.38, 67% (metabolism)<br>GO:0006813, 0.65±0.46, 100% (potassium ion transport)          | n/a                                                                                                                  |
|                                             | GO:00016020 (membrane)                                               | GO:0008076, 0.66±/-0.47, 69% (voltage-gated potassium channel complex)                                    | n/a                                                                                                                  |
|                                             | GO:00005554 (Molecular function unknown)                             | GO:0005249, 0.65±/-0.46, 58% (voltage-gated potassium channel)                                            | n/a                                                                                                                  |
| PFL1835w<br>hypothetical protein            | GO:0000004 (biological process unknown)                              | n/a                                                                                                       | GO:0009190, 0.0009±0.0019, 88% (cyclic nucleotide biosynthesis)<br>GO:0006304, 0.0015±0.0030, 56% (DNA modification) |
|                                             | GO:00016020 (membrane)<br>GO:0020011 (apicoplast)                    | GO:0016021, 0.0069±0.0124, 74% (integral to membrane)                                                     | GO:0005891, 0.01±0.01, 74% (voltage-gated calcium channel complex)<br>GO:0005884, 3e-05±7e-05, 56% (actin filament)  |
|                                             | GO:00005554 (Molecular function unknown)                             | n/a                                                                                                       | GO:0015078, 0.001±0.003, 96% (hydrogen ion transporter)                                                              |

|                                       |                                                   |                                                                                  |                                                                                                                                                                                                                                                                                                                                                                                                                                                                                                                           |
|---------------------------------------|---------------------------------------------------|----------------------------------------------------------------------------------|---------------------------------------------------------------------------------------------------------------------------------------------------------------------------------------------------------------------------------------------------------------------------------------------------------------------------------------------------------------------------------------------------------------------------------------------------------------------------------------------------------------------------|
|                                       |                                                   |                                                                                  | GO:0004601, 0.0003±0.0007, 68% (peroxidase)<br>GO:0003890, 3e-05±7e-05, 96% (beta DNA polymerase)<br>GO:0003889, 0.0001±0.0002, 100% (alpha DNA polymerase)<br>GO:0003902, 0.0002±0.0005, 56% (DNA-directed RNA polymerase III)<br>GO:0015399, 0.0758±0.1380, 58% (primary active transporter)<br>GO:0004842, 0.0196±0.0167, 79% (ubiquitin-protein ligase)<br>GO:0004222, 0.0033±0.0064, 80% (metalloendopeptidase)<br>GO:0005525, 0.0014±0.0021, 64% (GTP binding)<br>GO:0008270, 0.0014±0.0029, 56% (zinc ion binding) |
| PFL1825w hypothetical protein         | GO:0000004 (biological process unknown)           | n/a                                                                              | GO:0015980, 0.8536±0, 65% (energy derivation by oxidation of organic compounds)                                                                                                                                                                                                                                                                                                                                                                                                                                           |
|                                       | GO:00016020 (membrane)                            | GO:0005623, 1±0, 68% (cell)                                                      |                                                                                                                                                                                                                                                                                                                                                                                                                                                                                                                           |
|                                       | GO:00005554 (Molecular function unknown)          | n/a                                                                              | GO:0004026, 0.8536, ±0, 60% (alcohol O-acetyltransferase)                                                                                                                                                                                                                                                                                                                                                                                                                                                                 |
| PFL1780w hypothetical protein         | GO:0000004 (biological process unknown)           | n/a                                                                              | n/a                                                                                                                                                                                                                                                                                                                                                                                                                                                                                                                       |
|                                       | GO:00016020 (membrane)<br>GO:0020011 (apicoplast) | GO:0016020, 0.6512±0.4609, 91% (membrane)                                        | n/a                                                                                                                                                                                                                                                                                                                                                                                                                                                                                                                       |
|                                       | GO:00005554 (Molecular function unknown)          | GO:0004671, 0.6512±0.4609, 70% (protein-S-isoprenylcysteine O-methyltransferase) | n/a                                                                                                                                                                                                                                                                                                                                                                                                                                                                                                                       |
| PFL1710c tetQ family GTPase, putative | GO:0000004 (biological process unknown)           | GO:0006414, 0.7538±0.1860, 99% (translational elongation)                        | n/a                                                                                                                                                                                                                                                                                                                                                                                                                                                                                                                       |
|                                       | GO:0005739 (mitochondrion)                        |                                                                                  | GO:0005737, 0.5442±0.4546, 52%                                                                                                                                                                                                                                                                                                                                                                                                                                                                                            |

|                                                            |                                                      |                                                                                                            |                                                                                                     |
|------------------------------------------------------------|------------------------------------------------------|------------------------------------------------------------------------------------------------------------|-----------------------------------------------------------------------------------------------------|
|                                                            | GO:0020011 (apicoplast)                              |                                                                                                            | (cytoplasm)                                                                                         |
|                                                            | GO:0005525 (GTP binding)                             | GO:0005525, 0.3693±0.3237, 98% (GTP binding)<br>GO:0003746, 0.71±0.17, 99% (translation elongation factor) |                                                                                                     |
| PFC0495w<br>aspartyl protease,<br>putative                 | GO:0006508 (proteolysis and<br>peptidolysis)         | GO:0006508, 0.5244±0.4754, 76% (proteolysis and<br>peptidolysis)                                           | n/a                                                                                                 |
|                                                            | GO:0008372 (cellular_component<br>unknown)           | n/a                                                                                                        | n/a                                                                                                 |
|                                                            | GO:0004190 (aspartic-type<br>endopeptidase activity) | GO:0004194, 0.4976±0.4976, 100% (pepsin A)                                                                 | n/a                                                                                                 |
| PFB0795w<br>ATP synthase F1,<br>alpha subunit,<br>putative | GO:0000004 (biological process<br>unknown)           | GO:0015986, 0.3333±0.4082, 100%<br>(ATP synthesis coupled proton transport)                                | n/a                                                                                                 |
|                                                            | GO:0005739 (mitochondrion)                           | GO:0016469, 0.3437±0.4302, 90%<br>(hydrogen-transporting two-sector ATPase complex)                        | n/a                                                                                                 |
|                                                            | GO:0000554 (Molecular function<br>unknown)           | GO:0003936, 0.9638±0.0648, 100%<br>(hydrogen-transporting two-sector ATPase)                               | GO:0005224, 0.1695±0.3199, 100% (ATP-<br>binding and phosphorylation-dependent<br>chloride channel) |

### Manual assessment of false positives – IEA annotation excluded.

| Gene name and<br>annotated product<br>description | Original human GO annotation                                            | Without IEA annotations                                                                          |                                                            |
|---------------------------------------------------|-------------------------------------------------------------------------|--------------------------------------------------------------------------------------------------|------------------------------------------------------------|
|                                                   |                                                                         | Lowest scoring true positive                                                                     | Highest scoring false positive with P-score > 50%          |
| PFL2465<br>Thymidylate kinase                     | GO:0006235 (dTTP biosynthesis)                                          | GO:0006233, 0.32±0.45, 26% (dTDP biosynthesis)<br>GO:0006235, 0.32±0.45, 26% (dTTP biosynthesis) | GO:0019222, 0.002±0.003, 64% (regulation<br>of metabolism) |
|                                                   | GO:0008372 (cellular_component<br>unknown)                              | n/a                                                                                              | GO:0005737, 0.66±0.46, 76% (cytoplasm)                     |
|                                                   | GO:0004798 (thymidylate kinase<br>activity)<br>GO:0005524 (ATP binding) | GO:0004798, 0.98±0.02, 86% (thymidylate kinase activity)                                         | n/a                                                        |
| PFL1875w                                          | GO:0000004 (biological process)                                         | GO:0008152, 0.85±0.15, 73% (metabolism)                                                          | n/a                                                        |

|                               |                                                   |                                                                                                                                                                                      |                                                                                                                                                                                                                                      |
|-------------------------------|---------------------------------------------------|--------------------------------------------------------------------------------------------------------------------------------------------------------------------------------------|--------------------------------------------------------------------------------------------------------------------------------------------------------------------------------------------------------------------------------------|
| hypothetical protein          | unknown)                                          |                                                                                                                                                                                      |                                                                                                                                                                                                                                      |
|                               | GO:00016020 (membrane)                            | GO:0005623, 0.85±0.15, (cell)                                                                                                                                                        | GO:0005622, 0.85±0.15, 71% (intracellular)                                                                                                                                                                                           |
|                               | GO:00005554 (Molecular function unknown)          | n/a                                                                                                                                                                                  | GO:0005554, 0.15±0.15, 70% (molecular function unknown)                                                                                                                                                                              |
| PFL1835w hypothetical protein | GO:0000004 (biological process unknown)           | GO:0007582, 0.6145±0.2521, 75% (physiological processes)<br>GO:0009987, 0.6223±0.2971, 82% (cellular process)                                                                        | GO:0008151, 0.5920±0.2932, 70% (cell growth and/or maintenance)                                                                                                                                                                      |
|                               | GO:00016020 (membrane)<br>GO:0020011 (apicoplast) | GO:0016021, 0.0069±0.0124, 58% (integral to membrane)                                                                                                                                | GO:0005625, 0.0017±0.0035, 65% (soluble fraction)<br>GO:0005624, 0.0001±0.0003, 52% (membrane fraction)                                                                                                                              |
|                               | GO:00005554 (Molecular function unknown)          | n/a                                                                                                                                                                                  | GO:0005525, 0.0011±0.0022, 52% (GTP binding)<br>GO:0004930, 0.0011±0.0023, 71% (G-protein coupled receptor)                                                                                                                          |
| PFL1825w hypothetical protein | GO:0000004 (biological process unknown)           | n/a                                                                                                                                                                                  | GO:0006113, 0.8536±0, 54% (fermentation)<br>GO:0008151, 1±0, 100% (cell growth and/or maintenance)<br>GO:0006091, 0.8536±0, 82% (energy pathways)<br>GO:0015980, 0.8536±0, 81% (energy derivation by oxidation of organic compounds) |
|                               | GO:00016020 (membrane)                            | GO:0000267, 0.8536±0, 63% (cell fraction)                                                                                                                                            |                                                                                                                                                                                                                                      |
|                               | GO:00005554 (Molecular function unknown)          | n/a                                                                                                                                                                                  | GO:0008374, 0.8536±0, 70% (O-acyltransferase)<br>GO:0016407, 0.8536±0, 70% (acetyltransferase)                                                                                                                                       |
| PFL1780w hypothetical protein | GO:0000004 (biological process unknown)           | GO:0006464, 0.4769±0.4769, 83% (protein modification)                                                                                                                                | GO:0007323, 0.4769±0.4769, 83% (peptide pheromone maturation)                                                                                                                                                                        |
|                               | GO:00016020 (membrane)<br>GO:0020011 (apicoplast) | GO:0005783, 0.4769±0.4769, 52% (endoplasmic reticulum)<br>GO:0012505, 0.4769±0.4769, 51% (endomembrane system)                                                                       | n/a                                                                                                                                                                                                                                  |
|                               | GO:00005554 (Molecular function unknown)          | GO:0008171, 0.9769±0.0230, 92% (O-methyltransferase)<br>GO:0008757, 0.9769±0.0230, 92% (S-adenosylmethionine-dependent methyltransferase)<br>GO:0008276, 0.9769±0.0230, 92% (protein | n/a                                                                                                                                                                                                                                  |

|                                                            |                                                       |                                                                                                                        |                                                                                                                                                                                                              |
|------------------------------------------------------------|-------------------------------------------------------|------------------------------------------------------------------------------------------------------------------------|--------------------------------------------------------------------------------------------------------------------------------------------------------------------------------------------------------------|
|                                                            |                                                       | methyltransferase)                                                                                                     |                                                                                                                                                                                                              |
| PFL1710c<br>tetQ family GTPase,<br>putative                | GO:0000004 (biological process<br>unknown)            | GO:0006412, 0.4782±0.4060, 56%<br>(protein biosynthesis)                                                               | n/a                                                                                                                                                                                                          |
|                                                            | GO:0005739 (mitochondrion)<br>GO:0020011 (apicoplast) | n/a                                                                                                                    | GO:0005737, 0.3462±0.4325, 52%<br>(cytoplasm)                                                                                                                                                                |
|                                                            | GO:0005525 (GTP binding)                              | GO:0005525, 0.1341±0.0840, 54% (GTP binding)<br>GO:0003746, 0.4905±0.2708, 63% (translation elongation<br>factor)      | GO:0004930, 0.0017±0.0035, 71% (G-protein<br>coupled receptor)                                                                                                                                               |
| PFC0495w<br>aspartyl protease,<br>putative                 | GO:0006508 (proteolysis and<br>peptidolysis)          | GO:0008152, 0.6529±0.4620, 72% (metabolism)                                                                            | GO:0006351, 0.3333±0.4714, 53%<br>(transcription, DNA-dependent)                                                                                                                                             |
|                                                            | GO:0008372 (cellular_component<br>unknown)            | n/a                                                                                                                    | GO:0005622, 0.2276±0.3219, 56%<br>(intracellular)                                                                                                                                                            |
|                                                            | GO:0004190 (aspartic-type<br>endopeptidase activity)  | GO:0004190, 0.6558±0.4639, 80% (aspartic-type<br>endopeptidase)                                                        | n/a                                                                                                                                                                                                          |
| PFB0795w<br>ATP synthase F1,<br>alpha subunit,<br>putative | GO:0000004 (biological process<br>unknown)            | GO:0016887, 0.7943±0.3972, 82% (ATPase)<br>GO:0015405, 0.7642±0.3872, 72% (P-P-bond-hydrolysis-<br>driven transporter) |                                                                                                                                                                                                              |
|                                                            | GO:0005739 (mitochondrion)                            | GO:0005754, 0.3108±0.3825, 60%<br>(hydrogen-transporting ATP synthase, catalytic core (sensu<br>Eukarya))              |                                                                                                                                                                                                              |
|                                                            | GO:00005554 (Molecular function<br>unknown)           | GO:0015075, 0.2349±0.3884, 50% (ion transporter)                                                                       | GO:0016820, 0.7642±0.3872, 62%<br>(hydrolase, acting on acid anhydrides,<br>catalyzing transmembrane movement of<br>substances)<br>GO:0015442, 0.7642±0.3872, 72%<br>(hydrogen-/sodium-translocating ATPase) |
